# Supplementary material for: Nutrient dynamics in tropical rivers, lagoons, and coastal ecosystems of eastern Hainan Island, South China Sea
Source: Copernicus journal article supplement (doi:10.5194/bg-11-481-2014), 2014-01-30

# **Nutrient dynamics in tropical rivers, estuarine-lagoons, and coastal ecosystems along the eastern Hainan Island**

**Rui Huan Li<sup>1</sup>, Su Mei Liu<sup>1</sup>, Yan Wei Li<sup>1,2</sup>, Gui Ling Zhang<sup>1</sup>, Jing Ling Ren<sup>1</sup>, Jing Zhang<sup>3</sup>**

<sup>1</sup> Key Laboratory of Marine Chemistry Theory and Technology, Ministry of Education, College of Chemistry and Chemical Engineering, Ocean University of China, Qingdao 266100, China

<sup>2</sup> National Marine Environment Monitoring Centre, State Oceanic Administration, Dalian 116023, China

<sup>3</sup> State Key Laboratory of Estuarine and Coastal Research, East China Normal University, Shanghai 200062, China

SUPPLEMENTARY MATERIAL

Submitted to «Biogeosciences»

Figure S1 Vertical distributions of Temperature ( $^{\circ}\text{C}$ ), salinity, nutrients ( $\mu\text{M}$ ) during 2007–2009. (a) 18–22 August 2007, (b) 27 July–2 August 2008, (c) 6–12 April 2009, and (d) 29 July–3 August 2009. The blue dots denote the depths of water samples for nutrient analysis.

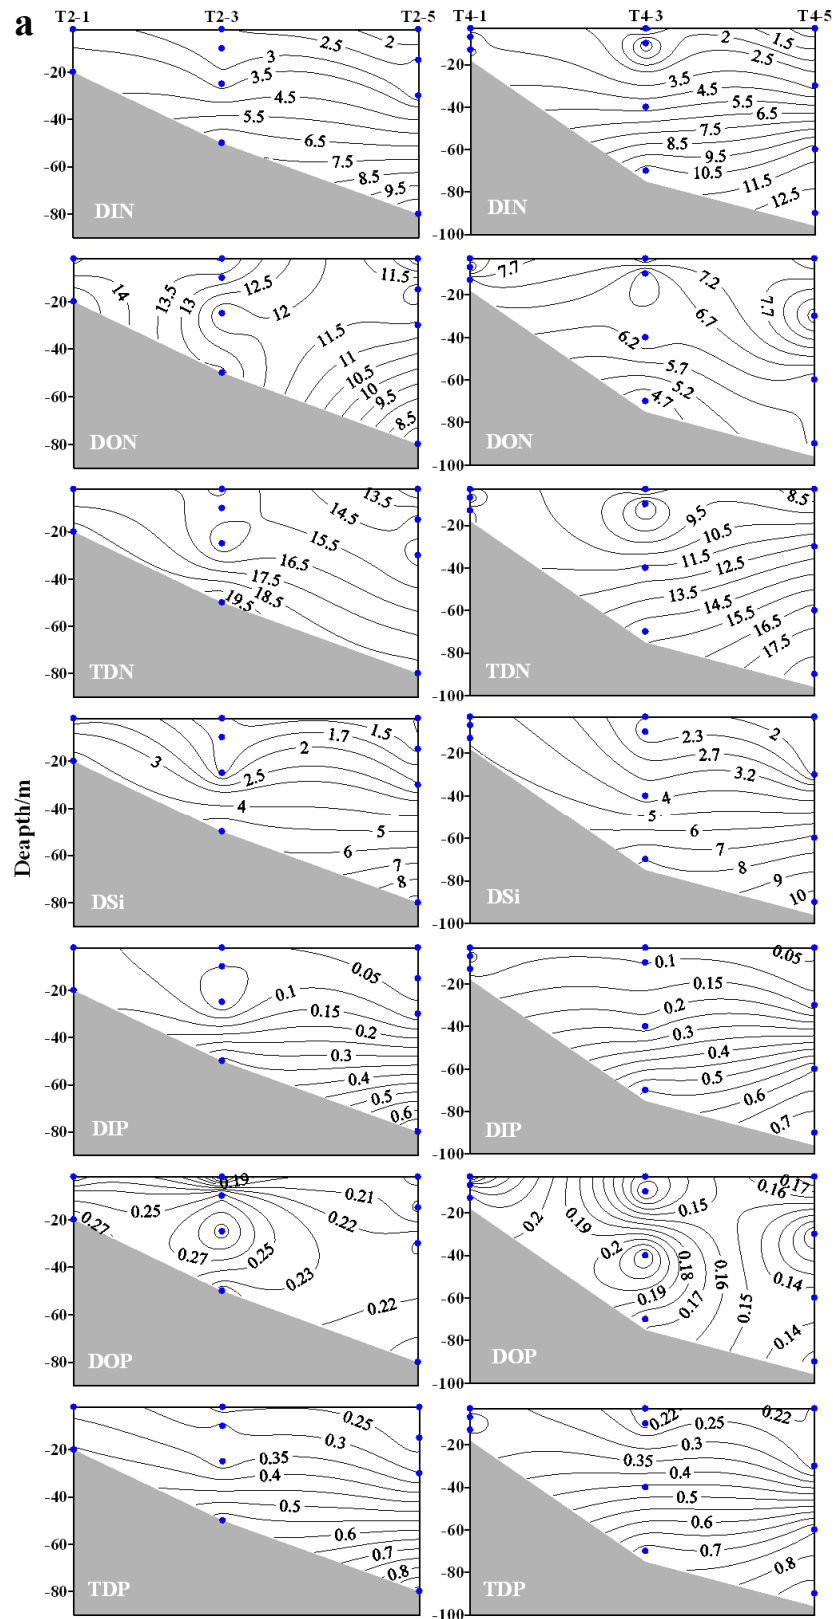

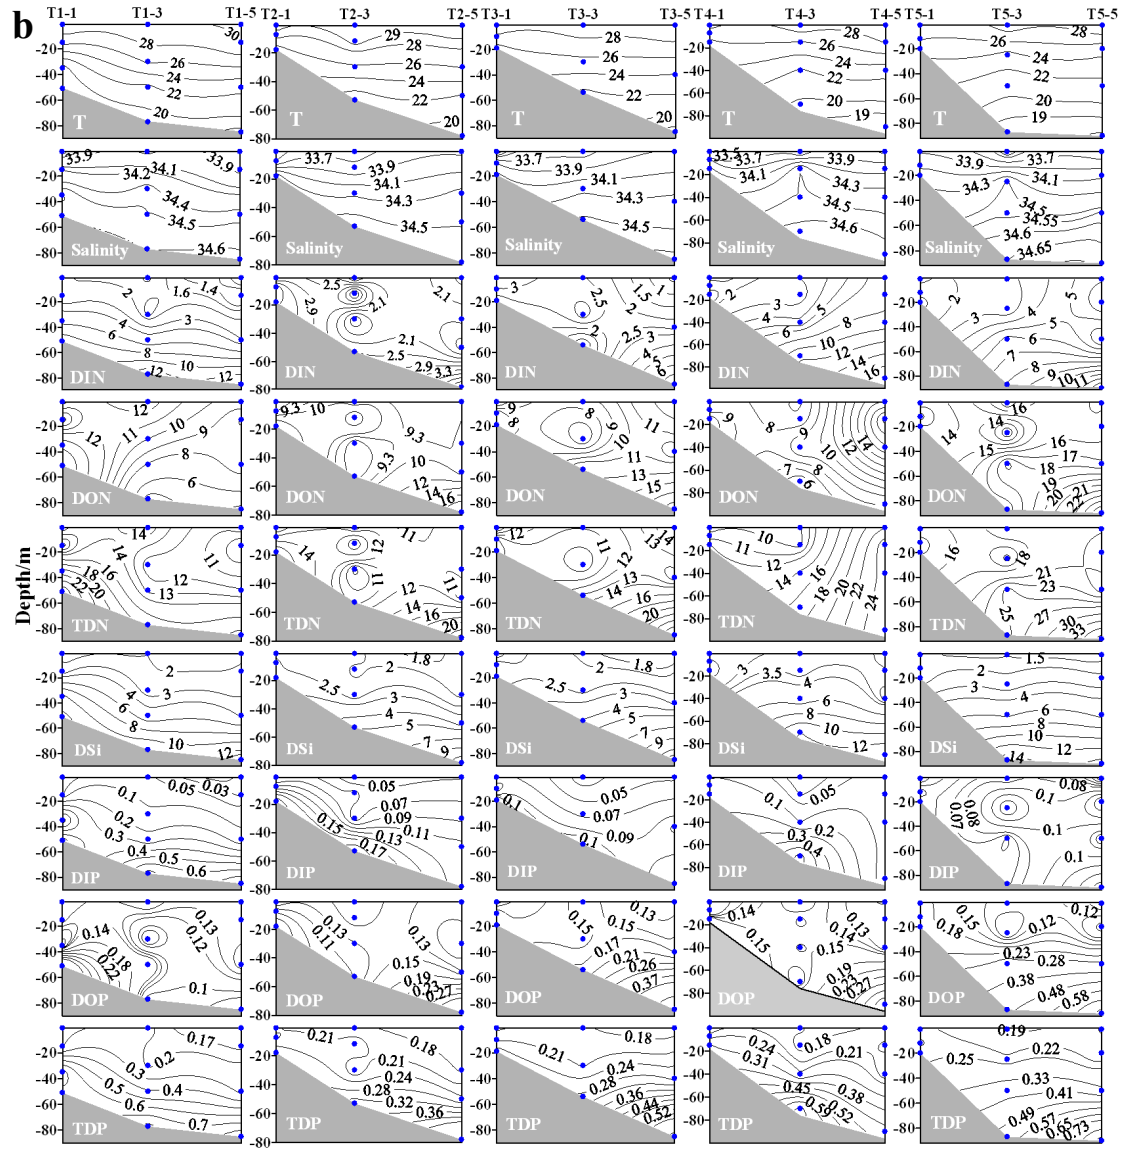

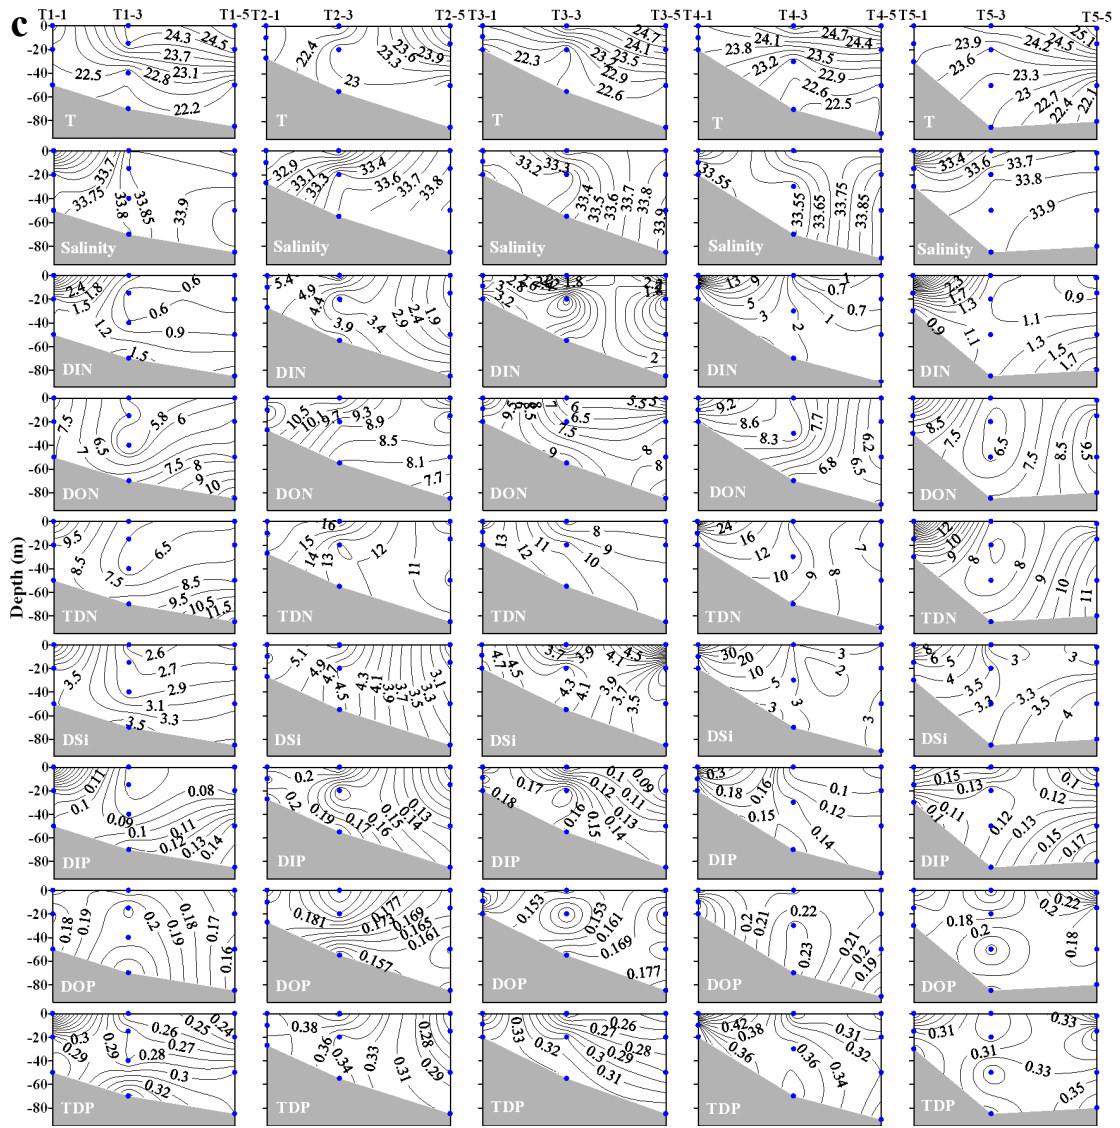

d

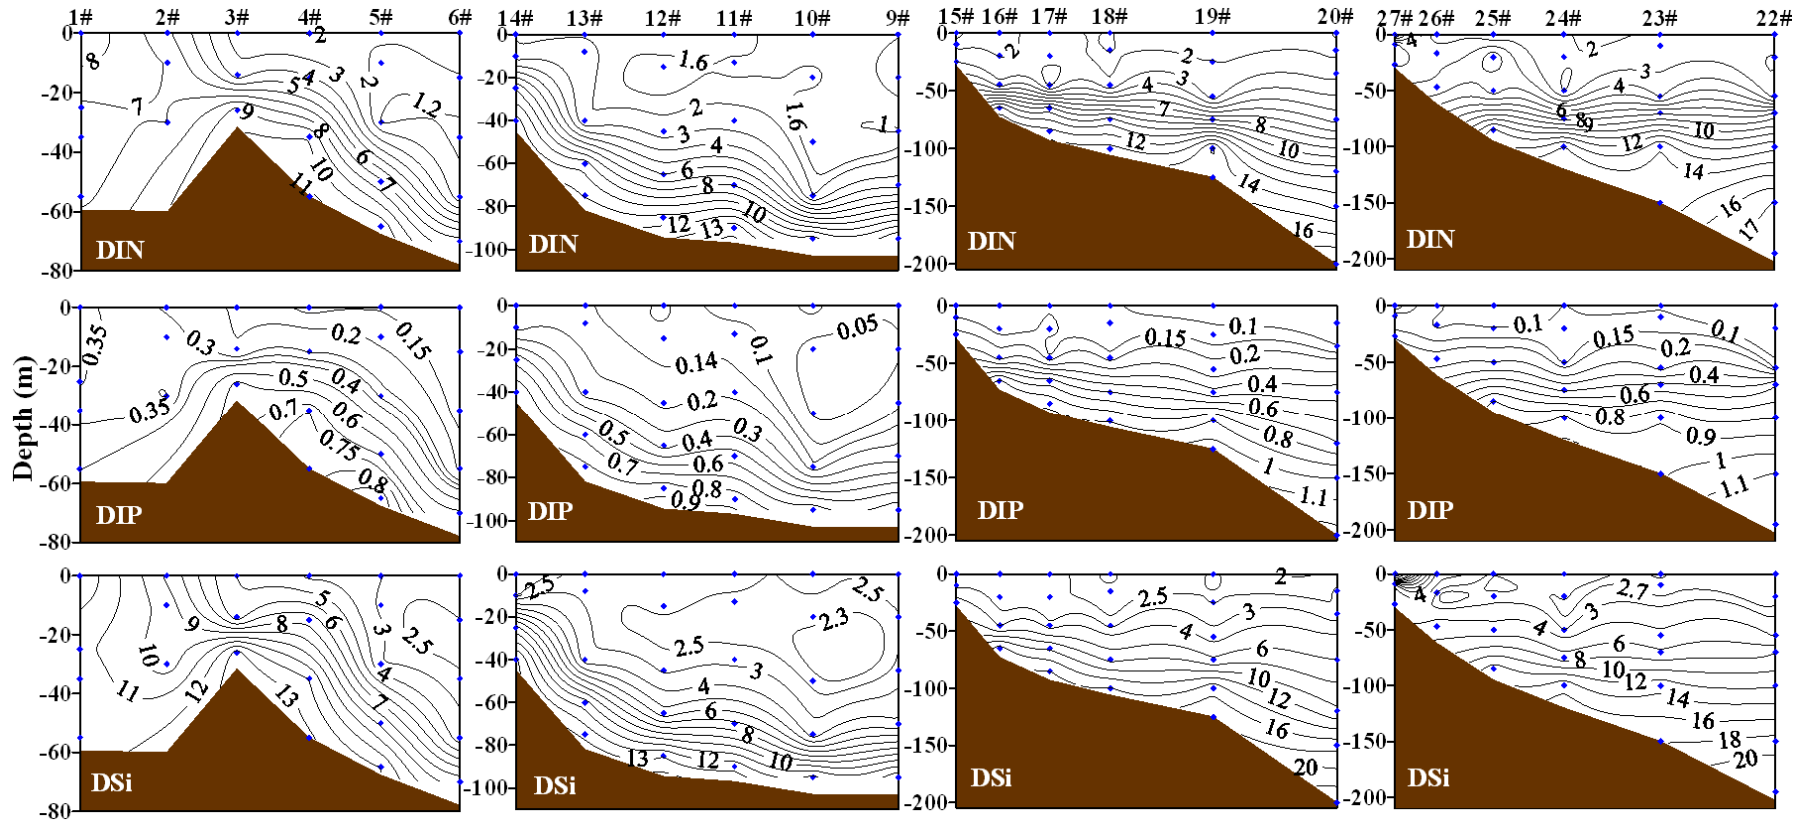

Supplement: Supplementary file 1 [file bg-11-481-2014-supplement.pdf]
